# Supplementary material for: Seven new species of Spathidexia Townsend (Diptera: Tachinidae) reared from caterpillars in Area de Conservación Guanacaste, Costa Rica
Source: PubMed Central journal article supplement (PMC4385903; doi:10.3897/bdj.3.e4597), 2015-03-25
Supplement: biodiversity_data_journal-3-e4597-s001.pdf [file biodiversity_data_journal-3-e4597-s001.pdf]

# BOLD TaxonID Tree

Title : SEARCH: Tax(Spathidexia) [SEARCH1]  
Date : 6-January-2015  
Data Type : Nucleotide  
Distance Model : Kimura 2 Parameter  
Marker : COI-5P  
Codon Positions : 1st, 2nd, 3rd  
Labels : Extra Info, SampleID, Sequence Length  
Filters : Length > 200  
Colorization : [blue]=Stop Codons [red]=Contamination or misidentification

Sequence Count : 168  
Species count : 6  
Genus count : 1  
Family count : 1  
Unidentified : 0

2 %

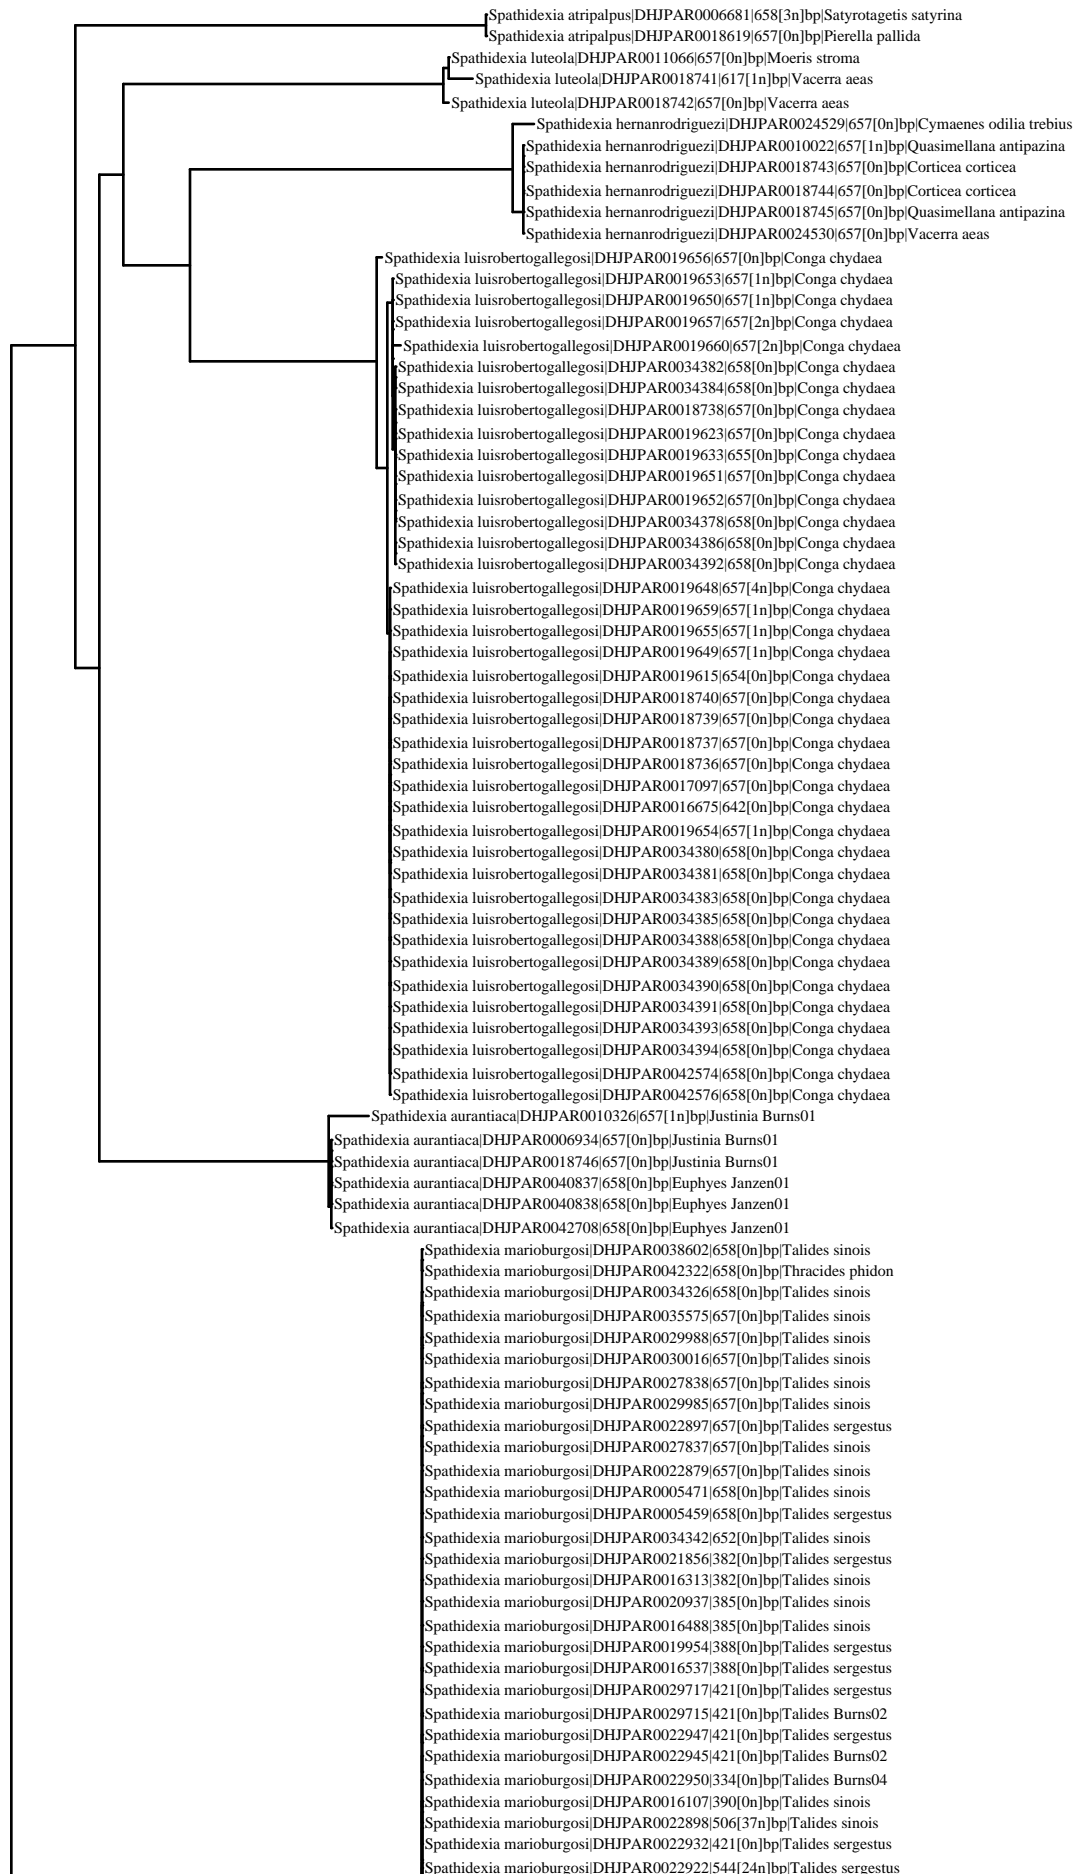

Spathidexia marioburgosi|DHJP|AK0022898|500|3/n|bp|1 andes sinois  
Spathidexia marioburgosi|DHJP|AR0022932|421|0n|bp|Talides sergestus  
Spathidexia marioburgosi|DHJP|AR0022922|544|24n|bp|Talides sergestus  
Spathidexia marioburgosi|DHJP|AR0022931|421|0n|bp|Talides sinois  
Spathidexia marioburgosi|DHJP|AR0022933|421|0n|bp|Talides sinois  
Spathidexia marioburgosi|DHJP|AR0022939|421|0n|bp|Talides sinois  
Spathidexia marioburgosi|DHJP|AR0022948|334|0n|bp|Talides sinois  
Spathidexia marioburgosi|DHJP|AR0022937|346|0n|bp|Talides sinois  
Spathidexia marioburgosi|DHJP|AR0022888|615|2n|bp|Talides sinois  
Spathidexia marioburgosi|DHJP|AR0022906|551|9n|bp|Talides sinois  
Spathidexia marioburgosi|DHJP|AR0022924|524|20n|bp|Talides sinois  
Spathidexia marioburgosi|DHJP|AR0023665|421|0n|bp|Talides sinois  
Spathidexia marioburgosi|DHJP|AR0022900|529|12n|bp|Talides sinois  
Spathidexia marioburgosi|DHJP|AR0030034|657|0n|bp|Talides sergestus  
Spathidexia marioburgosi|DHJP|AR0005445|658|0n|bp|Talides sergestus  
Spathidexia marioburgosi|DHJP|AR0022927|647|0n|bp|Talides sinois  
Spathidexia marioburgosi|DHJP|AR0016236|635|0n|bp|Talides sinois  
Spathidexia marioburgosi|DHJP|AR0022940|399|0n|bp|Talides sergestus  
Spathidexia marioburgosi|DHJP|AR0011572|387|0n|bp|Talides sergestus  
Spathidexia marioburgosi|DHJP|AR0023086|414|0n|bp|Talides Burns04  
Spathidexia marioburgosi|DHJP|AR0056202|670|0n|bp|Talides sinois  
Spathidexia marioburgosi|DHJP|AR0042704|658|0n|bp|Talides sergestus  
Spathidexia marioburgosi|DHJP|AR0049601|658|0n|bp|Talides sinois  
Spathidexia marioburgosi|DHJP|AR0022865|657|1n|bp|Talides sinois  
Spathidexia marioburgosi|DHJP|AR0022946|390|0n|bp|Talides sinois  
Spathidexia marioburgosi|DHJP|AR0022874|620|0n|bp|Talides sinois  
Spathidexia marioburgosi|DHJP|AR0016180|611|1n|bp|Talides sergestus  
Spathidexia marioburgosi|DHJP|AR0023084|611|3n|bp|Talides sinois  
Spathidexia marioburgosi|DHJP|AR0005453|631|8n|bp|Talides sinois  
Spathidexia marioburgosi|DHJP|AR0022869|657|4n|bp|Talides sinois  
Spathidexia marioburgosi|DHJP|AR0022918|628|1n|bp|Talides sinois  
Spathidexia marioburgosi|DHJP|AR0022916|547|1n|bp|Talides sinois  
Spathidexia marioburgosi|DHJP|AR0016242|559|2n|bp|Talides sergestus  
Spathidexia marioburgosi|DHJP|AR0005458|658|0n|bp|Talides sergestus  
Spathidexia marioburgosi|DHJP|AR0022905|657|0n|bp|Talides sergestus  
Spathidexia marioburgosi|DHJP|AR0022887|657|0n|bp|Talides sinois  
Spathidexia marioburgosi|DHJP|AR0005473|658|0n|bp|Talides sinois  
Spathidexia marioburgosi|DHJP|AR0005470|658|0n|bp|Talides sinois  
Spathidexia marioburgosi|DHJP|AR0005467|658|0n|bp|Talides sinois  
Spathidexia marioburgosi|DHJP|AR0022871|635|0n|bp|Talides sinois  
Spathidexia marioburgosi|DHJP|AR0022886|631|0n|bp|Talides sinois  
Spathidexia marioburgosi|DHJP|AR0016330|382|0n|bp|Talides sinois  
Spathidexia marioburgosi|DHJP|AR0019613|615|1n|bp|Talides sinois  
Spathidexia marioburgosi|DHJP|AR0020920|382|0n|bp|Talides sinois  
Spathidexia marioburgosi|DHJP|AR0020936|381|0n|bp|Talides sinois  
Spathidexia marioburgosi|DHJP|AR0022951|421|0n|bp|Talides sinois  
Spathidexia marioburgosi|DHJP|AR0056161|670|0n|bp|Talides Burns02  
Spathidexia marioburgosi|DHJP|AR0011559|603|8n|bp|Talides sinois  
Spathidexia marioburgosi|DHJP|AR0022917|544|13n|bp|Talides sergestus  
Spathidexia marioburgosi|DHJP|AR0022928|575|38n|bp|Talides sergestus  
Spathidexia marioburgosi|DHJP|AR0022885|582|20n|bp|Talides sinois  
Spathidexia marioburgosi|DHJP|AR0016600|600|0n|bp|Talides sinois  
Spathidexia marioburgosi|DHJP|AR0022860|576|6n|bp|Talides Burns04  
Spathidexia marioburgosi|DHJP|AR0030427|658|1n|bp|Talides sinois  
Spathidexia marioburgosi|DHJP|AR0005463|658|0n|bp|Talides sinois  
Spathidexia marioburgosi|DHJP|AR0022862|657|1n|bp|Talides sinois  
Spathidexia marioburgosi|DHJP|AR0022861|640|0n|bp|Talides Burns04  
Spathidexia marioburgosi|DHJP|AR0022863|637|0n|bp|Talides sinois  
Spathidexia marioburgosi|DHJP|AR0020938|655|0n|bp|Talides Burns02  
Spathidexia marioburgosi|DHJP|AR0015271|388|0n|bp|Talides sergestus  
Spathidexia marioburgosi|DHJP|AR0019550|551|6n|bp|Talides sergestus  
Spathidexia marioburgosi|DHJP|AR0022935|421|0n|bp|Talides sergestus  
Spathidexia marioburgosi|DHJP|AR0005454|631|1n|bp|Talides sergestus  
Spathidexia marioburgosi|DHJP|AR0022936|421|0n|bp|Talides Burns02  
Spathidexia marioburgosi|DHJP|AR0036458|657|0n|bp|Talides sergestus  
Spathidexia marioburgosi|DHJP|AR0022923|618|7n|bp|Talides Burns04  
Spathidexia marioburgosi|DHJP|AR0016073|615|1n|bp|Talides sinois  
Spathidexia marioburgosi|DHJP|AR0022921|613|3n|bp|Talides sinois  
Spathidexia marioburgosi|DHJP|AR0029994|657|0n|bp|Talides sinois  
Spathidexia marioburgosi|DHJP|AR0022925|657|0n|bp|Talides sinois  
Spathidexia marioburgosi|DHJP|AR0022912|657|0n|bp|Talides sinois  
Spathidexia marioburgosi|DHJP|AR0019711|657|1n|bp|Talides sinois  
Spathidexia marioburgosi|DHJP|AR0022911|657|3n|bp|Talides sinois  
Spathidexia marioburgosi|DHJP|AR0022884|620|4n|bp|Talides sinois  
Spathidexia marioburgosi|DHJP|AR0022883|617|4n|bp|Talides sergestus  
Spathidexia marioburgosi|DHJP|AR0029721|421|0n|bp|Talides sinois  
Spathidexia marioburgosi|DHJP|AR0029720|421|0n|bp|Talides sergestus  
Spathidexia marioburgosi|DHJP|AR0029719|421|0n|bp|Talides sergestus  
Spathidexia marioburgosi|DHJP|AR0022944|421|0n|bp|Talides Burns04  
Spathidexia marioburgosi|DHJP|AR0022943|421|0n|bp|Talides sinois  
Spathidexia marioburgosi|DHJP|AR0019710|656|15n|bp|Talides sinois  
Spathidexia marioburgosi|DHJP|AR0022941|370|0n|bp|Talides sergestus  
Spathidexia marioburgosi|DHJP|AR0022942|350|0n|bp|Talides Burns04  
Spathidexia marioburgosi|DHJP|AR0022952|381|0n|bp|Talides sergestus  
Spathidexia marioburgosi|DHJP|AR0034332|407|0n|bp|Talides sinois  
Spathidexia marioburgosi|DHJP|AR0005565|658|0n|bp|Talides sinois
